# Supplementary material for: Comparing the Characteristics and Outcomes of Male and Female Breast Cancer Patients in Korea: Korea Central Cancer Registry
Source: PubMed Central journal article supplement — Cancer Res Treat. 2020 Feb 13;52(3):739–46. doi: 10.4143/crt.2019.639 (PMC7373857; doi:10.4143/crt.2019.639), 2020-02-13
Supplement: crt-2019-639-suppl2.pdf [file crt-2019-639-suppl2.pdf]

**S2 Table.** The status of adjuvant chemotherapy according to disease stage

| Disease stage (2006-2016) | Characteristics | Men        | Women         | p-value <sup>a)</sup> |
|---------------------------|-----------------|------------|---------------|-----------------------|
| Localized                 | Chemo           | 98 (30.4)  | 38,430 (40.5) | < 0.001               |
|                           | No chemo        | 224 (69.6) | 56,587 (59.5) |                       |
| Regional                  | Chemo           | 152 (53.5) | 41,767 (71.5) | < 0.001               |
|                           | No chemo        | 132 (46.5) | 16,604 (28.5) |                       |
| Distant                   | Chemo           | 27 (54.0)  | 6,335 (74.9)  | < 0.001               |
|                           | No chemo        | 23 (46.0)  | 2,128 (25.1)  |                       |
| Unknown                   | Chemo           | 17 (23.0)  | 4,127 (40.4)  | 0.002                 |
|                           | No chemo        | 57 (77.0)  | 6,099 (59.6)  |                       |

Chemo, chemotherapy. <sup>a)</sup>Chi-square tests were performed to evaluate differences by factor.
